# Supplementary material for: Transcriptomic analysis of RDX and TNT interactive sublethal effects in the earthworm Eisenia fetida
Source: PubMed Central journal article supplement (PMC2386057; doi:10.1186/1471-2164-9-s1-s15), 2008-03-20
Supplement: 1471-2164-9-S1-S15-S1.pdf [file 1471-2164-9-S1-S15-S1.pdf]

Table S1. Hybridization scheme and array data deposition information. The complete dataset of 40 arrays/hybridizations was deposited in GEO with a series accession number of GSE8909 and a platform accession number of GPL5776.

| Hybridization | Cy3       | A647      | Slide barcode | GEO accession # |
|---------------|-----------|-----------|---------------|-----------------|
| 1             | TNT+RDX-5 | Control-1 | 13468230      | GSM225617       |
| 2             | Control-1 | RDX-1     | 13468227      | GSM225602       |
| 3             | TNT+RDX-1 | Control-2 | 13468226      | GSM225597       |
| 4             | Control-2 | RDX-2     | 13468229      | GSM225605       |
| 5             | TNT+RDX-2 | Control-3 | 13468225      | GSM225592       |
| 6             | Control-3 | RDX-3     | 13468224      | GSM225588       |
| 7             | TNT+RDX-3 | Control-4 | 13468221      | GSM225570       |
| 8             | Control-4 | RDX-4     | 13468222      | GSM225581       |
| 9             | TNT+RDX-4 | Control-5 | 13468219      | GSM225550       |
| 10            | Control-5 | RDX-5     | 13468233      | GSM225621       |
| 11            | Control-1 | RDX-2     | 13468235      | GSM225624       |
| 12            | TNT+RDX-1 | Control-3 | 13468237      | GSM225625       |
| 13            | Control-2 | RDX-3     | 13468240      | GSM225628       |
| 14            | TNT+RDX-2 | Control-4 | 13468241      | GSM225629       |
| 15            | Control-3 | RDX-4     | 13468239      | GSM225627       |
| 16            | TNT+RDX-3 | Control-5 | 13468238      | GSM225626       |
| 17            | Control-4 | RDX-5     | 13468242      | GSM225638       |
| 18            | TNT+RDX-4 | Control-1 | 13468245      | GSM225643       |
| 19            | Control-5 | RDX-1     | 13468244      | GSM225640       |
| 20            | TNT+RDX-5 | Control-2 | 13468243      | GSM225639       |
| 21            | RDX-1     | TNT-1     | 13436264      | GSM225531       |
| 22            | TNT-1     | TNT+RDX-1 | 13436254      | GSM225352       |
| 23            | RDX-2     | TNT-2     | 13436250      | GSM225345       |
| 24            | TNT-2     | TNT+RDX-2 | 13436152      | GSM225341       |
| 25            | RDX-3     | TNT-3     | 13436255      | GSM225359       |
| 26            | TNT-3     | TNT+RDX-3 | 13436237      | GSM225343       |
| 27            | RDX-4     | TNT-4     | 13436249      | GSM225344       |
| 28            | TNT-4     | TNT+RDX-4 | 13436150      | GSM225340       |
| 29            | RDX-5     | TNT-5     | 13436148      | GSM225315       |
| 30            | TNT-5     | TNT+RDX-5 | 13436153      | GSM225342       |
| 31            | RDX-1     | TNT-2     | 13436253      | GSM225346       |
| 32            | TNT-1     | TNT+RDX-2 | 13468777      | GSM225646       |
| 33            | RDX-2     | TNT-3     | 13468775      | GSM225644       |
| 34            | TNT-2     | TNT+RDX-3 | 13468232      | GSM225620       |
| 35            | RDX-3     | TNT-4     | 13468778      | GSM225650       |
| 36            | TNT-3     | TNT+RDX-4 | 13436149      | GSM225321       |
| 37            | RDX-4     | TNT-5     | 13436258      | GSM225525       |
| 38            | TNT-4     | TNT+RDX-5 | 13468220      | GSM225559       |
| 39            | RDX-5     | TNT-1     | 13468215      | GSM225536       |
| 40            | TNT-5     | TNT+RDX-1 | 13468234      | GSM225623       |
